# Supplementary material for: The Up-regulation of TNF-α Maintains Trigeminal Neuralgia by Modulating MAPKs Phosphorylation and BKCa Channels in Trigeminal Nucleus Caudalis
Source: Front Cell Neurosci. 2021 Nov 25;15:764141. doi: 10.3389/fncel.2021.764141 (PMC8657151; doi:10.3389/fncel.2021.764141)
Supplement: Supplementary file 1 [file Data_Sheet_1.PDF]

Figure 1 displays electrophysiological data. The top panel shows current traces for three conditions: Vehicle, Paxilline 10  $\mu$ M, and Vehicle. The bottom panel shows a voltage protocol with steps from -80 mV to +80 mV. Scale bars indicate 1 nA and 100 ms.
